# Supplementary material
Source: MDPI journal article supplement (https://www.mdpi.com/2227-9717/10/3/580)
Supplement: s1 [file s1]

## Supplementary Materials

**Table S1.** Average concentration of free sterols in canola seed and oil samples (mg/kg oil  $\pm$  standard deviation). Cumulative percentage gain/loss relative to previous process is represented in brackets under concentrations for refining methods. Total loss/gain is reported in the bottom row and represents the total loss or gain of bioactive compound from crude oil to the deodorisation step.

| Oil sample               | $\beta$ -sitosterol |                |                 |                |                 | Campesterol    |               |                |               |                | Brassicasterol |               |                |               |                |
|--------------------------|---------------------|----------------|-----------------|----------------|-----------------|----------------|---------------|----------------|---------------|----------------|----------------|---------------|----------------|---------------|----------------|
|                          | BC                  | EC             | EP              | CM             | CP              | BC             | EC            | EP             | CM            | CP             | BC             | EC            | EP             | CM            | CP             |
| Crude                    | 1920                | 1970           | 2090            | 1680           | 1410            | 1040           | 968           | 1040           | 961           | 941            | 474            | 516           | 549            | 420           | 378            |
|                          | $\pm 367$           | $\pm 269$      | $\pm 446$       | $\pm 323$      | N/A             | $\pm 124$      | $\pm 157$     | $\pm 154$      | $\pm 135$     | N/A            | $\pm 58.1$     | $\pm 36.7$    | $\pm 63.7$     | $\pm 72.2$    | N/A            |
| Degummed<br>/Neutralised | 1740<br>(-9.4)      | 1930<br>(-2.0) | 2120<br>(+1.4)  | –              | 1460<br>(+3.5)  | 908<br>(-12.7) | 937<br>(-3.2) | 1050<br>(+1.0) | –             | 932<br>(-1.0)  | 425<br>(-10.3) | 489<br>(-5.2) | 547<br>(-0.4)  | –             | 422<br>(+11.6) |
|                          | $\pm 488$           | $\pm 510$      | $\pm 405$       |                | N/A             | $\pm 50.8$     | $\pm 50.7$    | $\pm 167$      |               | N/A            | $\pm 70.6$     | $\pm 85.4$    | $\pm 50.7$     |               | N/A            |
| Bleached                 | 1640<br>(-5.7)      | 1830<br>(-5.2) | 2130<br>(+0.5)  | 1550<br>(-7.7) | 1180<br>(-19.2) | 874<br>(-3.7)  | 893<br>(-4.7) | 1040<br>(-1.0) | 861<br>(-9.4) | 719<br>(-22.9) | 393<br>(-7.5)  | 469<br>(-4.1) | 527<br>(-3.7)  | 415<br>(-1.2) | 304<br>(-28.0) |
|                          | $\pm 379$           | $\pm 527$      | $\pm 546$       | $\pm 421$      | N/A             | $\pm 68.9$     | $\pm 44.7$    | $\pm 101$      | $\pm 28.5$    | N/A            | $\pm 55.1$     | $\pm 87.0$    | $\pm 70.6$     | $\pm 89.8$    | N/A            |
| Deodorised               | 1600<br>(-2.4)      | 1760<br>(-3.8) | 1840<br>(-13.6) | –              | 987<br>(-16.4)  | 857<br>(-1.9)  | 861<br>(-3.6) | 873<br>(-16.1) | –             | 587<br>(-37.6) | 384<br>(-2.3)  | 436<br>(-7.0) | 467<br>(-11.4) | –             | 243<br>(-20.0) |
|                          | $\pm 427$           | $\pm 585$      | $\pm 476$       |                | N/A             | $\pm 39.6$     | $\pm 7.18$    | $\pm 63.2$     |               | N/A            | $\pm 67.3$     | $\pm 112$     | $\pm 84.8$     |               | N/A            |
| Total loss/gain (%)      | -16.7               | -10.6          | -12.0           | -7.7           | -30.0           | -17.6          | -11.1         | -16.1          | -9.4          | -37.6          | -19.0          | -15.5         | -14.9          | -1.2          | -35.7          |

**Note:** Only those steps common to all processes are reported here. Full results are supplied in the supporting information. BC = Blended – chemical refining, EC = Expeller extracted – chemical refining, EP = Expeller extracted – physical refining, CB = Cold-pressed – bleaching only, CP = Cold pressed – physical refining. (–) = not part of this process. N/A = “not available”.

**Table S2.** Concentration of esterified sterols in canola seed and oil samples (mg/kg oil  $\pm$  standard deviation). Cumulative percentage gain/loss relative to previous process is represented in brackets under concentrations for refining methods. Total loss/gain is reported in the bottom row and represents the total loss or gain of bioactive compound from crude oil to the deodorisation step.

| Oil sample               | $\beta$ -sitosterol |                |                |                |                | Campesterol    |                |                |                |                | Brassicasterol |               |               |               |               |
|--------------------------|---------------------|----------------|----------------|----------------|----------------|----------------|----------------|----------------|----------------|----------------|----------------|---------------|---------------|---------------|---------------|
|                          | BC                  | EC             | EP             | CM             | CP             | BC             | EC             | EP             | CM             | CP             | BC             | EC            | EP            | CM            | CP            |
| Crude                    | 2210                | 2270           | 2390           | 1870           | 1890           | 1690           | 1640           | 1690           | 1550           | 1830           | 310            | 330           | 340           | 263           | 302           |
|                          | $\pm 359$           | $\pm 136$      | $\pm 342$      | $\pm 80.6$     | N/A            | $\pm 251$      | $\pm 430$      | $\pm 357$      | $\pm 590$      | N/A            | $\pm 10.6$     | $\pm 18.0$    | $\pm 0.37$    | $\pm 13.1$    | N/A           |
| Degummed/<br>Neutralised | 2270<br>(+2.7)      | 2420<br>(+6.6) | 2460<br>(+2.9) | –              | 1810<br>(-4.2) | 1700<br>(+0.6) | 1700<br>(+3.7) | 1710<br>(+1.2) | –              | 1710<br>(-6.6) | 314<br>(+1.3)  | 340<br>(+3.0) | 340<br>(0.0)  | –             | 296<br>(-2.0) |
|                          | $\pm 432$           | $\pm 242$      | $\pm 241$      |                | N/A            | $\pm 218$      | $\pm 360$      | $\pm 409$      |                | N/A            | $\pm 19.6$     | $\pm 0.84$    | $\pm 7.40$    |               | N/A           |
| Bleached                 | 2290<br>(+0.9)      | 2430<br>(+0.4) | 2480<br>(+0.8) | 1850<br>(-1.1) | 1800<br>(-0.6) | 1750<br>(+2.9) | 1670<br>(-1.8) | 1720<br>(+0.6) | 1510<br>(-2.4) | 1730<br>(+1.2) | 328<br>(+4.5)  | 346<br>(+1.8) | 353<br>(+3.8) | 274<br>(+4.2) | 322<br>(+8.8) |
|                          | $\pm 409$           | $\pm 246$      | $\pm 353$      | $\pm 250$      | N/A            | $\pm 269$      | $\pm 292$      | $\pm 329$      | $\pm 314$      | N/A            | $\pm 21.8$     | $\pm 13.0$    | $\pm 1.15$    | $\pm 26.7$    | N/A           |
| Deodorised               | 2280<br>(-0.4)      | 2440<br>(+0.4) | 2490<br>(+0.4) | –              | 1870<br>(+3.9) | 1750<br>(0.0)  | 1700<br>(+1.8) | 1720<br>(0.0)  | –              | 1790<br>(+3.5) | 331<br>(+0.9)  | 353<br>(+2.0) | 357<br>(+1.1) | –             | 347<br>(+7.8) |
|                          | $\pm 362$           | $\pm 468$      | $\pm 387$      |                | N/A            | $\pm 273$      | $\pm 187$      | $\pm 304$      |                | N/A            | $\pm 17.9$     | $\pm 31.3$    | $\pm 11.2$    |               | N/A           |
| Total<br>loss/gain (%)   | +3.2                | +7.5           | +4.2           | -1.1           | -1.0           | +3.6           | +3.7           | +1.8           | -2.4           | -2.2           | +6.8           | +7.0          | +5.0          | +4.2          | +14.9         |

**Note:** Only those steps common to all processes are reported here. Full results are supplied in the supporting information. BC = Blended – chemical refining, EC = Expeller extracted – chemical refining, EP = Expeller extracted – physical refining, CB = Cold-pressed – bleaching only, CP = Cold pressed – physical refining. (–) = not part of this process. N/A = “not available.
